# Supplementary material for: Longitudinal tau PET using [18F]flortaucipir: Comparison of (semi)quantitative parameters
Source: bioRxiv or medRxiv preprint supplement (doi:10.1101/2021.08.27.21262740), 2021-08-30
Supplement: Supplementary file [file media-1.pdf]

## SUPPLEMENT

### Longitudinal tau PET using [<sup>18</sup>F]flortaucipir: Comparison of (semi)quantitative parameters

Denise Visser<sup>1†</sup>, Hayel Tuncel<sup>1†</sup>, Rik Ossenkoppele<sup>2,3</sup>, Maqsood Yaqub<sup>1</sup>, Emma E Wolters<sup>1,2</sup>, Tessa Timmers<sup>1,2</sup>, Emma Weltings<sup>1</sup>, Emma M Coomans<sup>1</sup>, Marijke den Hollander<sup>1</sup>, Wiesje M van der Flier<sup>2,4</sup>, Bart NM van Berckel<sup>1</sup>, and Sandeep SV Golla<sup>1</sup>

<sup>1</sup> *Department of Radiology & Nuclear Medicine, Amsterdam Neuroscience, Vrije Universiteit Amsterdam, Amsterdam UMC, Amsterdam, The Netherlands*

<sup>2</sup> *Alzheimer Center Amsterdam,, Department of Neurology, Amsterdam Neuroscience, Vrije Universiteit Amsterdam, Amsterdam UMC, Amsterdam, The Netherlands*

<sup>3</sup> *Clinical Memory Research Unit, Lund University, Lund, Sweden*

<sup>4</sup> *Department of Epidemiology and Biostatistics, Vrije Universiteit Amsterdam, Amsterdam UMC, Amsterdam, The Netherlands*

† both authors contributed equally

Corresponding author:

Denise Visser, Department of Radiology & Nuclear Medicine, Amsterdam University Medical Centers, location VUmc, Amsterdam, The Netherlands, P.O. Box 7057, 1007 MB Amsterdam, The Netherlands; phone number: +31 20 4449298; fax number: +31 20 4448529. E-mail: [d.visser2@amsterdamumc.nl](mailto:d.visser2@amsterdamumc.nl); ORCID ID: 0000-0002-3642-146X

**sTable-1. Percentage overestimation of SUVR<sub>80-100</sub> relative to DVR.** Mean ± SD are provided.

|                     | SCD         |             | AD           |              |
|---------------------|-------------|-------------|--------------|--------------|
|                     | BL          | FU          | BL           | FU           |
| <b>Braak I/II</b>   | 8.95 (3.92) | 8.16 (3.39) | 11.49 (3.46) | 11.18 (3.21) |
| <b>Braak III/IV</b> | 5.34 (3.02) | 4.97 (2.67) | 8.59 (3.04)  | 9.47 (3.29)  |
| <b>Braak V/VI</b>   | 3.19 (2.35) | 3.00 (1.98) | 7.08 (3.59)  | 7.97 (3.47)  |

**sTable-2. Annualized %change for [<sup>18</sup>F]flortaucipir DVR and SUVR<sub>80-100</sub> in SCD subjects.** Mean ± SD are provided. DVR = BP<sub>ND</sub>+1.

| SCD (n=38)          | Annualized %change DVR | Annualized %change SUVR <sub>80-100</sub> |
|---------------------|------------------------|-------------------------------------------|
| <b>Braak I/II</b>   | 1.27 (1.44)            | 0.92 (1.62)                               |
| <b>Braak III/IV</b> | 1.41 (1.31)            | 1.23 (1.32)                               |
| <b>Braak V/VI</b>   | 1.16 (1.38)            | 1.08 (1.61)                               |

**sTable-3. Annualized %change for [<sup>18</sup>F]flortaucipir DVR and SUVR<sub>80-100</sub> values in AD patients.** Mean ± SD are provided. DVR = BP<sub>ND</sub>+1.

| AD (n=24)           | Annualized %change DVR | Annualized %change SUVR <sub>80-100</sub> |
|---------------------|------------------------|-------------------------------------------|
| <b>Braak I/II</b>   | 1.54 (1.77)            | 1.42 (2.35)                               |
| <b>Braak III/IV</b> | 2.86 (2.13)            | 3.23 (2.51)                               |
| <b>Braak V/VI</b>   | 3.15 (2.65)            | 3.53 (3.01)                               |
